# Supplementary material
Source: publisher figshare collection journal article supplement (https://sage.figshare.com/ndownloader/files/22055733)
Supplement: Supplementary file 1 [file 22055733]

## **Follow Up Parent Interview Protocol**

In the following interview, I hope to learn a bit about your experience implementing intervention strategies in your everyday routines and activities. This information will be used to design family friendly interventions focused on meeting families' needs in facilitating their child's development at home. Please feel free to share as much or as little information as you would like and ask any questions that come to mind. All the information you share will remain confidential and will not be linked to your family or child.

### **1. Tell me about how you became involved in the intervention?**

- a. What were your reasons for enrolling in the intervention study?
- b. Did you have any particular goals for your child or yourself or expectations for the experience?

### **2. What parts of the intervention worked well or did not work well for you and your family?**

- a. Can you share a success story?
- b. Were the videos helpful? Those of you interacting with your child? Those of others implementing the intervention strategies?
- c. Were you able to integrate the intervention into your everyday routines and activities? Can you give an example?
- d. Did you encounter any barriers or challenges? Can you give an example?

### **3. Do you feel that you had adequate training in order to deliver the strategies to your child?**

- a. How did your relationship with your intervention provider impact this ability?

**4. Do you feel like the time frame for the intervention was appropriate?**

- a. Did you think individual intervention sessions lasted an adequate amount of time?
- b. Did you feel like the start to finish duration of the intervention period (from focusing on faces through initiating joint attention) was enough time?
- c. Do you feel you had enough time during your day (in regular routines and activities) to deliver the intervention strategies to your child? How do the intervention strategies match with your family's daily routines and activities?

**5. How did you and/or your child benefit from participating in the study?**

- a. Do you feel you have gained further understanding of autism spectrum disorder (ASD)?
- b. Do you feel like you understand the intervention content such as the concept joint attention? If yes, how has this information been helpful?

**6. If you were to participate in an intervention similar to this one again, what would be most helpful to you as a parent?**

- a. Given your experiences, how might the intervention have been improved?
